# Supplementary material for: Injectable, in situ gelling, cyclodextrin–dextran hydrogels for the partitioning-driven release of hydrophobic drugs
Source: Royal Society of Chemistry journal article supplement (doi:10.1039/c4tb00631c), 2014-05-30
Supplement: c4tb00631c1.pdf [file c4tb00631c1.pdf]

## Supplementary Information

Injectable, *in-situ* gelling, cyclodextrin-dextran hydrogels for the partitioning-driven release of hydrophobic drugs

Rabia Mateen<sup>1</sup> and Todd Hoare<sup>1,2</sup>

<sup>1</sup>School of Biomedical Engineering, McMaster University

<sup>2</sup>Department of Chemical Engineering, McMaster University

Correspondence:

Todd Hoare

Department of Chemical Engineering, McMaster University, 1280 Main Street West, Hamilton, Ontario, Canada L8S 4L7

email: [hoaretr@mcmaster.ca](mailto:hoaretr@mcmaster.ca)

phone: (905) 525-9140 ext. 24701

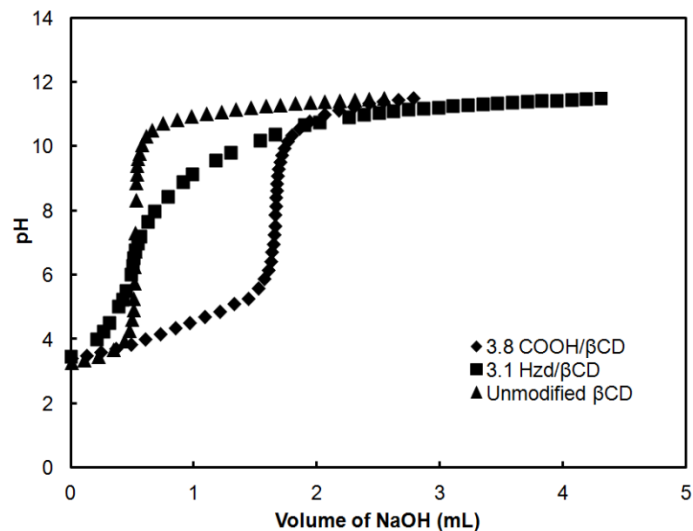

**Figure S1** Titration curve of the hydrazide functionalized βCD (3.1 hydrazides/βCD). The titration curves of the carboxymethylated βCD intermediate and unmodified βCD are also shown for comparison purposes.

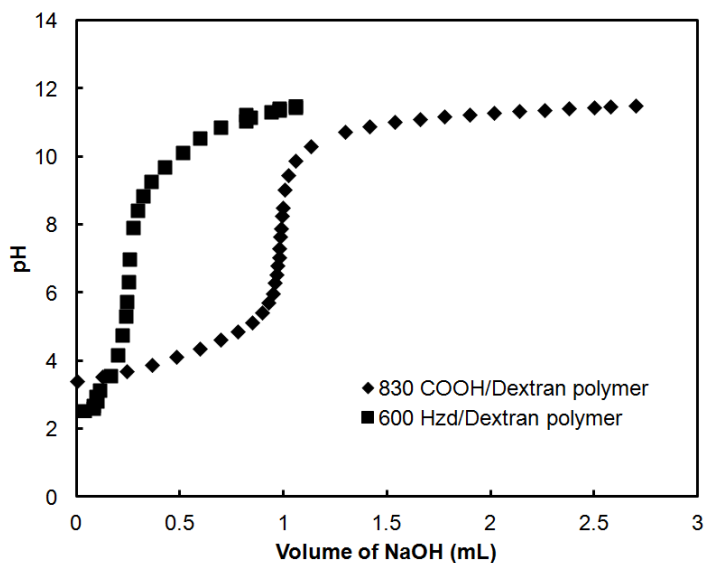

**Figure S2** Titration curve of the hydrazide functionalized dextran used in the synthesis of Dex-βCD hydrogels. The titration curve of the carboxymethylated dextran intermediate is also shown for comparison purposes.

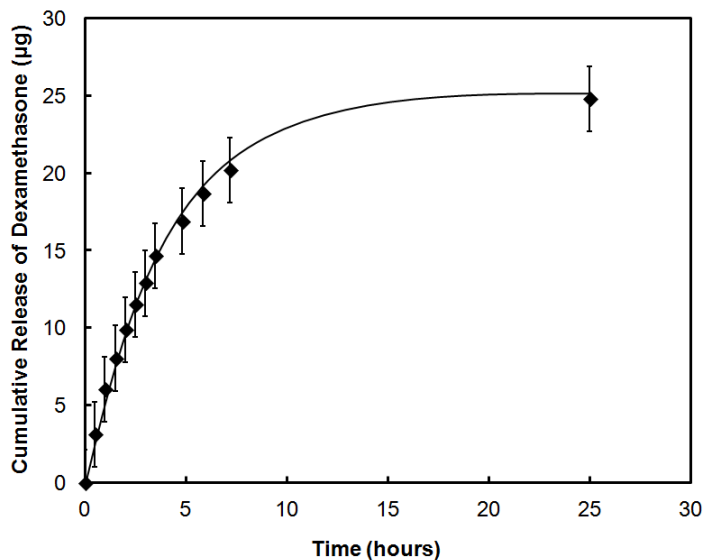

**Figure S3** Cumulative release of dexamethasone from Dex- $\beta$ CD hydrogels formed in the absence of the hydrazide modified dextran polymer. Gels were prepared using the highest injectable concentration of aldehyde functionalized dextran (8 wt%), but they degrade after one day when soaked in PBS at 37°C.

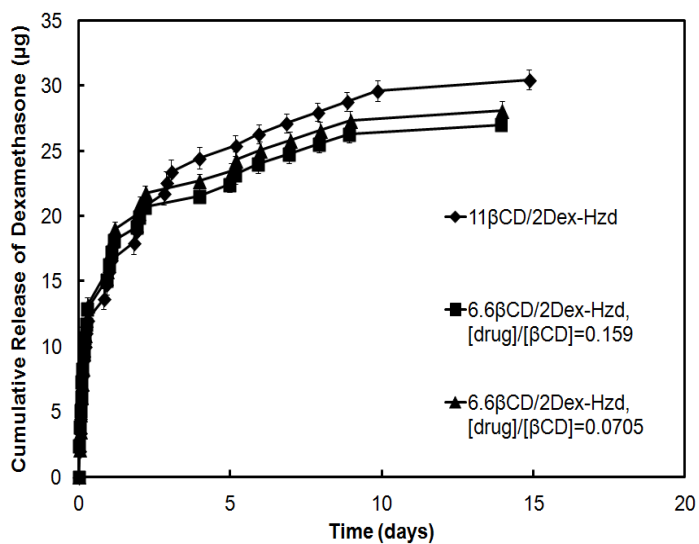

**Figure S4** Comparison of cumulative dexamethasone release from 11 $\beta$ CD/2Dex-Hzd and 6.6 $\beta$ CD/2Dex-Hzd hydrogels in PBS at 37°C.

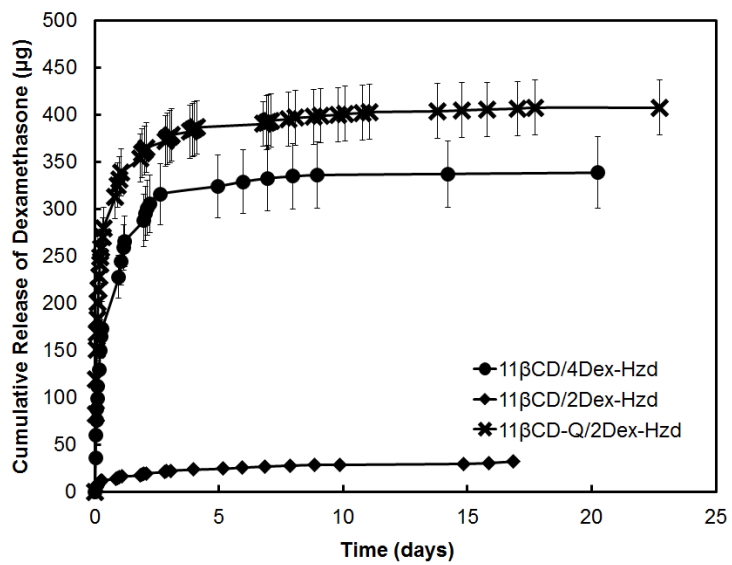

**Figure S5** Comparison of cumulative dexamethasone release from 11βCD/2Dex-Hzd and 11βCD/4Dex-Hzd hydrogels in PBS at 37°C.

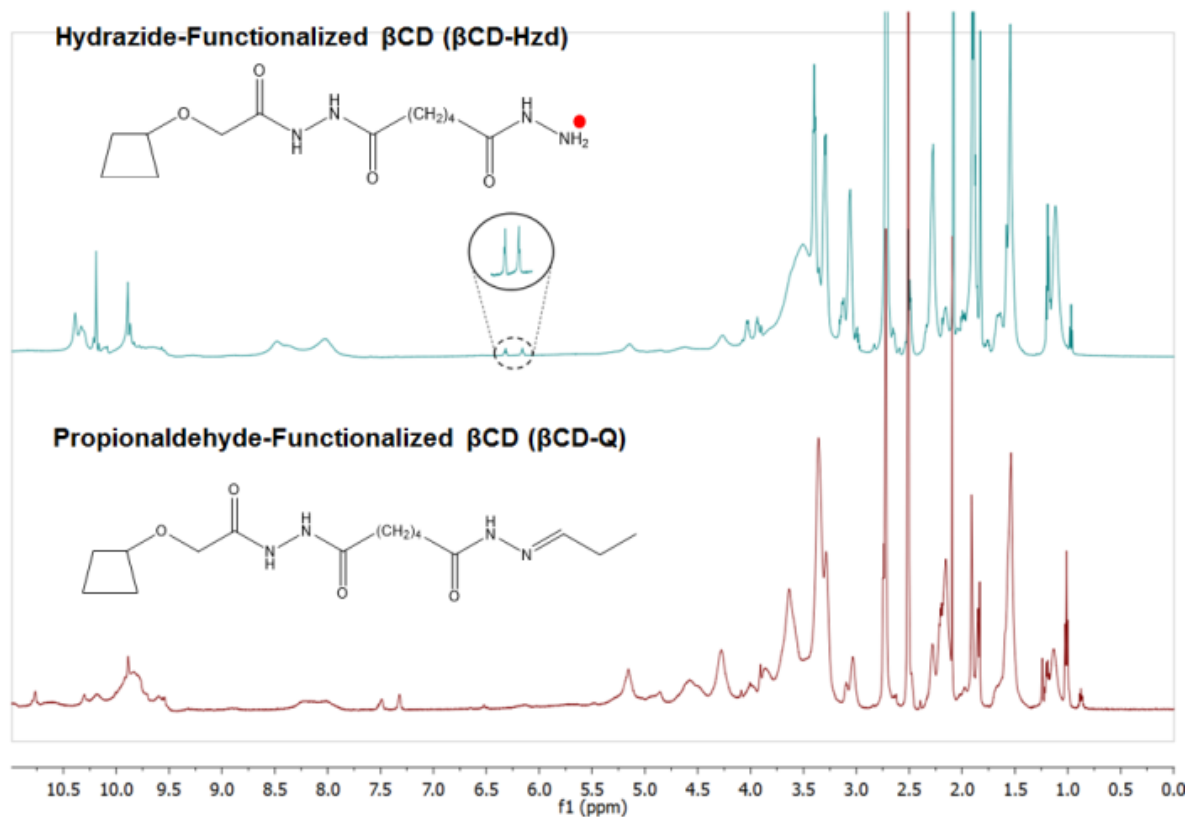

**Figure S6**  $^1\text{H-NMR}$  (600 MHz, Bruker) of the hydrazide-functionalized  $\beta$ CD precursor ( $\beta$ CD-Hzd) and the propionaldehyde-functionalized  $\beta$ CD product ( $\beta$ CD-Q). The disappearance of the terminal hydrazide proton doublet peak at  $\delta = 6.1\text{-}6.4$  following propionaldehyde functionalization, indicates at least near-quantitative conversion of the reactive hydrazide groups to the capped, unreactive propyl end groups.
